# Supplementary material for: Functional analyses of phosphatidylserine/PI(4)P exchangers with diverse lipid species and membrane contexts reveal unanticipated rules on lipid transfer
Source: PubMed Central journal article supplement (PMC8606082; doi:10.1186/s12915-021-01183-1), 2021-11-20
Supplement: 12915_2021_1183_MOESM2_ESM.pdf [file 12915_2021_1183_MOESM2_ESM.pdf]

**Additional file for**

**Functional analyses of phosphatidylserine/PI(4)P exchangers with diverse lipid species and membrane contexts reveal unanticipated rules on lipid transfer**

Souade Ikhlef<sup>1\*</sup>, Nicolas-Frédéric Lipp<sup>1,3\*</sup>, Vanessa Delfosse<sup>2</sup>, Nicolas Fuggetta<sup>1</sup>, William Bourguet<sup>2</sup>, Maud Magdeleine<sup>1</sup> and Guillaume Drin<sup>1</sup>

Correspondence to: [drin@ipmc.cnrs.fr](mailto:drin@ipmc.cnrs.fr)

**Table S1 to S9**

**Table S1** – Individual data points ( $F/F_0$  values) related to Fig. 4b

**Table S2** - Individual data points ( $F/F_0$ ) related to Fig. 4c

**Table S3** - Individual data points ( $T_m$ ) related to Fig. 4e

**Table S4** – Individual data points ( $F/F_0$ ) related to Fig. 6f

**Table S5** – Individual data points ( $F/F_0$ ) related to Fig. S5a

**Table S6** – Individual data points ( $F/F_0$ ) related to Fig. S5b

**Table S7** - Individual data points (fluo) related to Fig. S7d

**Table S8** - Individual data points ( $T_m$ ) related to Fig. S8e

**Table S1 – Individual data points (F/F<sub>0</sub> values) related to Fig. 4b**

| [PS]<br>( $\mu$ M) | F/F <sub>0</sub> (335nm) |       |       |              |       |       |              |       |       |              |       |       |              |       |       |
|--------------------|--------------------------|-------|-------|--------------|-------|-------|--------------|-------|-------|--------------|-------|-------|--------------|-------|-------|
|                    | 12:0/12:0-PS             |       |       | 14:0/14:0-PS |       |       | 16:0/16:0-PS |       |       | 18:0/18:0-PS |       |       | 18:0/18:1-PS |       |       |
|                    | n1                       | n2    | n3    | n1           | n2    | n3    | n1           | n2    | n3    | n1           | n2    | n3    | n1           | n2    | n3    |
| 0                  | 0.804                    | 0.802 | 0.805 | 0.822        | 0.801 | 0.820 | 0.798        | 0.788 | 0.829 | 0.798        | 0.826 | 0.783 | 0.800        | 0.814 | 0.797 |
| 0.25               | 0.836                    | 0.844 | 0.844 | 0.866        | 0.879 | 0.903 | 0.881        | 0.889 | 0.971 | 0.813        | 0.841 | 0.790 | 0.901        | 0.962 | 0.936 |
| 0.5                | 0.858                    | 0.875 | 0.872 | 0.896        | 0.921 | 0.964 | 0.912        | 0.924 | 1.025 | 0.818        | 0.842 | 0.797 | 0.921        | 0.999 | 0.974 |
| 0.75               | 0.872                    | 0.882 | 0.897 | 0.910        | 0.950 | 1.000 | 0.934        | 0.949 | 1.045 | 0.824        | 0.851 | 0.799 | 0.930        | 1.010 | 0.980 |
| 1                  | 0.886                    | 0.899 | 0.913 | 0.911        | 0.967 | 1.021 | 0.950        | 0.954 | 1.053 | 0.834        | 0.846 | 0.797 | 0.932        | 1.017 | 0.987 |
| 1.25               | 0.892                    | 0.896 | 0.933 | 0.916        | 0.965 | 1.041 | 0.957        | 0.955 | 1.052 | 0.836        | 0.846 | 0.803 | 0.937        | 1.027 | 0.981 |

| [PS]<br>( $\mu$ M) | F/F <sub>0</sub> (335nm) |       |       |              |       |       |              |       |       |              |       |       |              |       |       |       |
|--------------------|--------------------------|-------|-------|--------------|-------|-------|--------------|-------|-------|--------------|-------|-------|--------------|-------|-------|-------|
|                    | 18:1/18:0-PS             |       |       | 18:1/18:1-PS |       |       | 18:2/18:2-PS |       |       | 16:0/18:1-PS |       |       | 16:0/18:2-PS |       |       |       |
|                    | n1                       | n2    | n3    | n1           | n2    | n3    | n1           | n2    | n3    | n1           | n2    | n3    | n1           | n2    | n3    |       |
| 0                  | 0.811                    | 0.811 | 0.815 | 0.804        | 0.796 | 0.805 | 0.799        | 0.807 | 0.811 | 0.820        | 0.805 | 0.801 | 0.791        | 0.801 | 0.807 | 0.821 |
| 0.25               | 0.859                    | 0.878 | 0.885 | 0.927        | 0.968 | 0.979 | 0.900        | 0.927 | 0.948 | 0.942        | 0.949 | 1.006 | 0.990        | 0.817 | 0.847 | 0.851 |
| 0.5                | 0.884                    | 0.926 | 0.924 | 0.949        | 0.988 | 1.021 | 0.913        | 0.964 | 0.972 | 0.971        | 0.962 | 1.030 | 1.008        | 0.836 | 0.865 | 0.890 |
| 0.75               | 0.909                    | 0.957 | 0.955 | 0.952        | 1.003 | 1.025 | 0.918        | 0.980 | 0.994 | 0.983        | 0.967 | 1.035 | 1.005        | 0.852 | 0.877 | 0.909 |
| 1                  | 0.920                    | 0.977 | 0.963 | 0.959        | 1.009 | 1.029 | 0.916        | 0.985 | 0.994 | 0.989        | 0.968 | 1.033 | 1.006        | 0.864 | 0.896 | 0.937 |
| 1.25               | 0.934                    | 0.996 | 0.969 | 0.966        | 1.025 | 1.032 | 0.915        | 0.998 | 0.999 | 0.993        | 0.967 | 1.045 | 1.006        | 0.876 | 0.890 | 0.942 |

**Table S2 - Individual data points (F/F<sub>0</sub>) related to Fig. 4c**

| [PI(4)P]<br>( $\mu$ M) | F/F <sub>0</sub> (335nm) |       |       |                  |       |       |       |                  |       |       |
|------------------------|--------------------------|-------|-------|------------------|-------|-------|-------|------------------|-------|-------|
|                        | 16:0/16:0-PI(4)P         |       |       | 16:0/18:1-PI(4)P |       |       |       | 18:0/20:4-PI(4)P |       |       |
|                        | n1                       | n2    | n3    | n1               | n2    | n3    | n4    | n1               | n2    | n3    |
| 0                      | 0.773                    | 0.774 | 0.851 | 0.786            | 0.782 | 0.854 | 0.822 | 0.784            | 0.819 | 0.839 |
| 0.25                   | 0.844                    | 0.867 | 0.908 | 0.945            | 0.954 | 0.962 | 0.932 | 0.947            | 0.934 | 0.960 |
| 0.5                    | 0.910                    | 0.928 | 0.960 | 0.969            | 0.963 | 0.960 | 0.945 | 0.966            | 0.937 | 0.971 |
| 0.75                   | 0.935                    | 0.949 | 0.981 | 0.973            | 0.970 | 0.961 | 0.943 | 0.971            | 0.937 | 0.975 |
| 1                      | 0.945                    | 0.948 | 0.987 | 0.975            | 0.979 | 0.963 | 0.947 | 0.975            | 0.939 | 0.976 |
| 1.25                   | 0.942                    | 0.945 | 0.988 | 0.989            | 0.981 | 0.964 | 0.939 | 0.980            | 0.939 | 0.986 |

**Table S3 - Individual data points (T<sub>m</sub>) related to Fig. 4e**

| Lipid subspecies | T <sub>m</sub> (°C) |       |       |       |
|------------------|---------------------|-------|-------|-------|
|                  | n1                  | n2    | n3    | n4    |
| 12:0/12:0-PS     | 44.62               | 47.27 | 46.05 |       |
| 14:0/14:0-PS     | 45.34               | 47.12 | 45.73 |       |
| 16:0/16:0-PS     | 46.30               | 46.72 | 49.26 |       |
| 18:0/18:0-PS     | 44.15               | 44.35 | 46.41 |       |
| 18:0/18:1-PS     | 46.38               | 47.24 | 50.88 | 51.39 |
| 18:1/18:0-PS     | 48.13               | 50.13 | 48.61 |       |
| 18:1/18:1-PS     | 47.01               | 46.86 | 50.31 | 51.45 |
| 18:2/18:2-PS     | 47.39               | 48.04 | 49.03 |       |
| 16:0/18:1-PS     | 48.64               | 48.77 | 52.86 |       |
| 16:0/18:2-PS     | 47.96               | 46.98 | 48.55 |       |
| 16:0/16:0-PI(4)P | 52.43               | 53.45 | 50.39 |       |
| 16:0/18:1-PI(4)P | 55.97               | 58.40 | 53.91 |       |
| 18:0/20:4-PI(4)P | 62.15               | 61.72 | 62.55 |       |
| DOPC only        | 45.57               | 46.82 | 45.73 | 43.19 |

**Table S4 – Individual data points (F/F<sub>0</sub>) related to Fig. 6f**

| F/F <sub>0</sub> (335nm) Osh6p |                  |       |       |                  |       |       |                                 |       |       |                                 |       |       |
|--------------------------------|------------------|-------|-------|------------------|-------|-------|---------------------------------|-------|-------|---------------------------------|-------|-------|
| [PIP]<br>( $\mu$ M)            | 16:0/16:0-PI(4)P |       |       | 18:0/20:4-PI(4)P |       |       | 16:0/16:0-PI(4,5)P <sub>2</sub> |       |       | 18:0/20:4-PI(4,5)P <sub>2</sub> |       |       |
|                                | n1               | n2    | n3    | n1               | n2    | n3    | n1                              | n2    | n3    | n1                              | n2    | n3    |
| 0                              | 0.798            | 0.782 | 0.854 | 0.780            | 0.780 | 0.780 | 0.827                           | 0.832 | 0.816 | 0.780                           | 0.849 | 0.827 |
| 0.25                           | 0.877            | 0.858 | 0.911 | 0.816            | 0.816 | 0.816 | 0.835                           | 0.847 | 0.828 | 0.816                           | 0.878 | 0.862 |
| 0.5                            | 0.946            | 0.916 | 0.950 | 0.841            | 0.841 | 0.841 | 0.834                           | 0.851 | 0.836 | 0.841                           | 0.890 | 0.886 |
| 0.75                           | 0.977            | 0.941 | 0.971 | 0.855            | 0.855 | 0.855 | 0.833                           | 0.858 | 0.840 | 0.855                           | 0.897 | 0.900 |
| 1                              | 0.979            | 0.949 | 0.975 | 0.863            | 0.863 | 0.863 | 0.837                           | 0.867 | 0.844 | 0.863                           | 0.898 | 0.909 |
| 1.25                           | 0.987            | 0.954 | 0.984 | 0.867            | 0.867 | 0.867 | 0.842                           | 0.870 | 0.840 | 0.867                           | 0.897 | 0.918 |

| F/F <sub>0</sub> (335nm) ORD8 |                  |       |       |                  |       |       |                                 |       |       |                                 |       |       |
|-------------------------------|------------------|-------|-------|------------------|-------|-------|---------------------------------|-------|-------|---------------------------------|-------|-------|
| [PIP]<br>( $\mu$ M)           | 16:0/16:0-PI(4)P |       |       | 18:0/20:4-PI(4)P |       |       | 16:0/16:0-PI(4,5)P <sub>2</sub> |       |       | 18:0/20:4-PI(4,5)P <sub>2</sub> |       |       |
|                               | n1               | n2    | n3    | n1               | n2    | n3    | n1                              | n2    | n3    | n1                              | n2    | n3    |
| 0                             | 0.770            | 0.760 | 0.794 | 0.831            | 0.753 | 0.779 | 0.790                           | 0.781 | 0.785 | 0.780                           | 0.766 | 0.760 |
| 0.25                          | 0.829            | 0.812 | 0.848 | 1.013            | 0.920 | 0.917 | 0.810                           | 0.795 | 0.790 | 0.791                           | 0.776 | 0.765 |
| 0.5                           | 0.876            | 0.862 | 0.918 | 1.079            | 0.977 | 0.978 | 0.827                           | 0.805 | 0.807 | 0.800                           | 0.783 | 0.765 |
| 0.75                          | 0.901            | 0.899 | 0.959 | 1.092            | 0.991 | 0.996 | 0.839                           | 0.826 | 0.820 | 0.807                           | 0.789 | 0.782 |
| 1                             | 0.922            | 0.928 | 0.996 | 1.099            | 0.998 | 1.010 | 0.852                           | 0.831 | 0.839 | 0.815                           | 0.801 | 0.785 |
| 1.25                          | 0.942            | 0.944 | 1.011 | 1.101            | 0.996 | 1.015 | 0.866                           | 0.858 | 0.851 | 0.818                           | 0.813 | 0.795 |

**Table S5 – Individual data points (F/F<sub>0</sub>) related to Fig. S5a**

| F/F <sub>0</sub> (335nm) |              |       |       |              |       |       |              |       |       |              |       |       |
|--------------------------|--------------|-------|-------|--------------|-------|-------|--------------|-------|-------|--------------|-------|-------|
| [PS]<br>( $\mu$ M)       | 12:0/12:0-PS |       |       | 14:0/14:0-PS |       |       | 16:0/16:0-PS |       |       | 18:0/18:0-PS |       |       |
|                          | n1           | n2    | n3    | n1           | n2    | n3    | n1           | n2    | n3    | n1           | n2    | n3    |
| 0                        | 0.788        | 0.785 | 0.795 | 0.785        | 0.794 | 0.794 | 0.777        | 0.786 | 0.784 | 0.776        | 0.812 | 0.789 |
| 0.25                     | 0.805        | 0.792 | 0.802 | 0.789        | 0.798 | 0.812 | 0.796        | 0.804 | 0.796 | 0.780        | 0.811 | 0.788 |
| 0.5                      | 0.818        | 0.804 | 0.812 | 0.809        | 0.815 | 0.821 | 0.824        | 0.828 | 0.803 | 0.788        | 0.817 | 0.797 |
| 0.75                     | 0.831        | 0.817 | 0.815 | 0.818        | 0.829 | 0.832 | 0.842        | 0.844 | 0.818 | 0.798        | 0.833 | 0.822 |
| 1                        | 0.850        | 0.822 | 0.832 | 0.837        | 0.840 | 0.845 | 0.860        | 0.859 | 0.836 | 0.812        | 0.843 | 0.834 |
| 1.25                     | 0.855        | 0.847 | 0.839 | 0.842        | 0.848 | 0.863 | 0.888        | 0.871 | 0.842 | 0.825        | 0.855 | 0.842 |

| F/F <sub>0</sub> (335nm) |              |       |       |              |       |       |              |       |       |              |       |       |              |       |       |              |       |       |
|--------------------------|--------------|-------|-------|--------------|-------|-------|--------------|-------|-------|--------------|-------|-------|--------------|-------|-------|--------------|-------|-------|
| [PS]<br>( $\mu$ M)       | 18:0/18:1-PS |       |       | 18:1/18:0-PS |       |       | 18:1/18:1-PS |       |       | 18:2/18:2-PS |       |       | 16:0/18:1-PS |       |       | 16:0/18:2-PS |       |       |
|                          | n1           | n2    | n3    | n1           | n2    | n3    | n1           | n2    | n3    | n1           | n2    | n3    | n1           | n2    | n3    | n1           | n2    | n3    |
| 0                        | 0.790        | 0.843 | 0.771 | 0.783        | 0.789 | 0.787 | 0.780        | 0.800 | 0.779 | 0.782        | 0.788 | 0.795 | 0.791        | 0.780 | 0.792 | 0.794        | 0.790 | 0.787 |
| 0.250                    | 0.884        | 0.898 | 0.828 | 0.821        | 0.822 | 0.825 | 0.876        | 0.865 | 0.857 | 0.893        | 0.895 | 0.864 | 0.891        | 0.857 | 0.861 | 0.811        | 0.810 | 0.819 |
| 0.50                     | 0.956        | 0.953 | 0.883 | 0.859        | 0.854 | 0.859 | 0.932        | 0.933 | 0.919 | 0.942        | 0.934 | 0.918 | 0.939        | 0.910 | 0.940 | 0.843        | 0.833 | 0.843 |
| 0.750                    | 0.991        | 0.987 | 0.930 | 0.893        | 0.876 | 0.888 | 0.964        | 0.974 | 0.949 | 0.962        | 0.967 | 0.945 | 0.965        | 0.920 | 0.971 | 0.862        | 0.848 | 0.868 |
| 10                       | 1.025        | 1.012 | 0.958 | 0.921        | 0.888 | 0.914 | 0.985        | 0.994 | 0.973 | 0.974        | 0.982 | 0.969 | 0.980        | 0.942 | 1.002 | 0.887        | 0.871 | 0.886 |
| 1.25                     | 1.035        | 1.026 | 0.974 | 0.941        | 0.902 | 0.926 | 1.010        | 1.016 | 0.990 | 0.984        | 0.987 | 0.981 | 1.000        | 0.955 | 1.012 | 0.900        | 0.889 | 0.902 |

**Table S6 – Individual data points (F/F<sub>0</sub>) related to Fig. S5b**

| F/F <sub>0</sub> (335 nm) |                  |       |       |                  |       |       |                  |       |       |       |
|---------------------------|------------------|-------|-------|------------------|-------|-------|------------------|-------|-------|-------|
| [PI(4)P]<br>( $\mu$ M)    | 16:0/16:0-PI(4)P |       |       | 18:1/18:1-PI(4)P |       |       | 18:0/20:4-PI(4)P |       |       |       |
|                           | n1               | n2    | n3    | n4               | n1    | n2    | n3               | n1    | n2    | n3    |
| 0                         | 0.778            | 0.780 | 0.766 | 0.782            | 0.773 | 0.761 | 0.790            | 0.793 | 0.788 | 0.785 |
| 0.25                      | 0.828            | 0.830 | 0.816 | 0.840            | 0.916 | 0.900 | 0.921            | 0.934 | 0.957 | 0.958 |
| 0.5                       | 0.876            | 0.882 | 0.865 | 0.907            | 0.976 | 0.954 | 0.976            | 0.994 | 1.002 | 0.996 |
| 0.75                      | 0.913            | 0.915 | 0.896 | 0.960            | 0.987 | 0.963 | 1.002            | 1.003 | 1.010 | 0.999 |
| 1                         | 0.937            | 0.933 | 0.914 | 0.973            | 1.003 | 0.963 | 1.031            | 1.010 | 1.012 | 1.005 |
| 1.25                      | 0.948            | 0.940 | 0.933 | 1.001            | 1.014 | 0.965 | 1.020            | 1.017 | 1.011 | 1.020 |

**Table S7 - Individual data points (fluo) related to Fig. S7d**

| Total lipids ( $\mu\text{M}$ ) | Fluorescence (a.u.)   |       |       |        |       |       |
|--------------------------------|-----------------------|-------|-------|--------|-------|-------|
|                                | PI(4,5)P <sub>2</sub> |       |       | PI(4)P |       |       |
|                                | n1                    | n2    | n3    | n1     | n2    | n3    |
| 0                              | 18027                 | 15976 | 15408 | 15634  | 15024 | 13992 |
| 5                              | 23345                 | 19501 | 20825 |        |       |       |
| 10                             | 22805                 | 23268 | 22142 |        |       |       |
| 15                             | 26347                 | 24482 | 25256 |        |       |       |
| 20                             | 35246                 | 27347 | 26090 |        |       |       |
| 25                             | 40763                 | 29669 | 24861 | 18199  | 17684 | 16212 |
| 30                             | 39599                 | 28738 | 26675 |        |       |       |
| 40                             | 29972                 | 30411 | 29666 |        |       |       |
| 50                             | 30431                 | 31203 | 26948 | 18320  | 15777 | 16121 |
| 60                             | 29796                 | 31276 | 29289 |        |       |       |
| 70                             | 33880                 | 31207 | 28592 |        |       |       |
| 75                             |                       |       |       | 17590  | 16895 | 16493 |
| 80                             | 32991                 | 36286 | 30961 |        |       |       |
| 90                             | 31552                 | 33376 | 29708 |        |       |       |
| 100                            | 33019                 | 30373 | 31772 | 17691  | 18077 | 16448 |
| 125                            | 36319                 | 32019 | 32556 | 17017  | 19129 | 16526 |
| 150                            | 36001                 | 34892 | 33312 | 17437  | 17480 | 16366 |
| 175                            | 37528                 | 35223 | 31278 | 17402  | 16508 | 17603 |
| 200                            | 37873                 | 35580 | 32985 | 18237  | 17465 | 16878 |
| 225                            | 37177                 | 36105 | 31785 |        |       |       |
| 250                            | 35968                 | 37192 | 33009 | 19588  | 18457 | 16664 |
| 275                            | 37697                 | 37451 | 31552 |        |       |       |
| 300                            | 37247                 | 36062 | 31324 | 19070  | 18772 | 17500 |
| 350                            | 36453                 | 35773 | 32198 |        |       |       |

**Table S8 - Individual data points (Tm) related to Fig. S8e**

| Lipid subspecies                | Tm ( $^{\circ}\text{C}$ ) |       |       |
|---------------------------------|---------------------------|-------|-------|
|                                 | n1                        | n2    | n3    |
| 16:0/16:0-PI(4)P                | 53.45                     | 50.39 | 50.64 |
| 16:0/16:0-PI(4,5)P <sub>2</sub> | 44.64                     | 44.85 |       |
| 18:0/20:4-PI(4)P                | 61.72                     | 62.55 |       |
| 18:0/20:4-PI(4,5)P <sub>2</sub> | 46.29                     | 44.68 | 45.06 |
| DOPC only                       | 45.73                     | 43.19 | 43.17 |
